# Supplementary material for: Timing and localization of human dystrophin isoform expression provide insights into the cognitive phenotype of Duchenne muscular dystrophy
Source: PubMed Central journal article supplement (PMC5626779; doi:10.1038/s41598-017-12981-5), 2017-10-03
Supplement: 41598_2017_12981_MOESM1_ESM.pdf [file 41598_2017_12981_MOESM1_ESM.pdf]

## Supplementary Information

### **Timing and localization of human dystrophin isoform expression provide insights into the cognitive phenotype of Duchenne muscular dystrophy**

Nathalie Doorenweerd\*, Ahmed Mahfouz, Maaïke van Putten, Rajaram Kaliyaperumal, Peter A.C. 't Hoen, Jos G.M. Hendriksen, Annemieke M. Aartsma-Rus, Jan J.G.M. Verschuuren, Erik H. Niks, Marcel J.T. Reinders, Hermien E. Kan, Boudewijn P.F. Lelieveldt

\*Corresponding author email: [N.Doorenweerd@lumc.nl](mailto:N.Doorenweerd@lumc.nl)

#### **This PDF file includes:**

Supplementary Figure 1

Supplementary Table 1

Supplementary Table 7

Supplementary Table 8

#### **Other Supplementary Material for this manuscript**

Tables S2 – S6 (as Excel files)

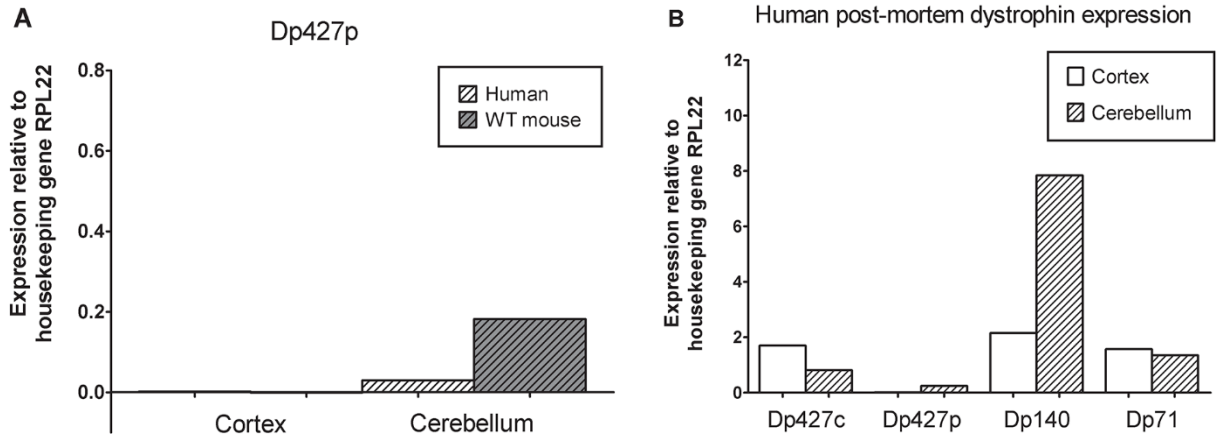

**Supplementary Figure 1. Ex-vivo qPCR isoform expression.** Dystrophin isoform expression qPCR results are depicted as a ratio with respect to housekeeping gene RPL22 to allow for comparison. Figure A shows expression of isoform Dp427p in the human and wild type (WT) mouse cortex and cerebellum. Figure B shows the expression of the isoforms Dp427c, Dp427p, Dp140 and Dp71 in the human cortex and cerebellum.

**Supplementary Table 1. Overview of the donor brains included, per age and sex, divided into developmental stages**

| Developmental stage |           |                 | Donors                                                                |
|---------------------|-----------|-----------------|-----------------------------------------------------------------------|
| 1                   | 8-9 pcw   | Early fetal     | 8 pcw 1♂, 9 pcw 1♂                                                    |
| 2                   | 12-19 pcw | Early-mid fetal | 12 pcw 3♀, 13 pcw 2♂ & 1♀, 16 pcw 3♂, 17 pcw 1♀, 19 pcw 1♀            |
| 3                   | 21-37 pcw | Mid-late fetal  | 21 pcw 1♂ & 1♀, 24 pcw 1♂, 25 pcw 1♀, 26 pcw 1♀, 35 pcw 1♀, 37 pcw 1♂ |
| 4                   | 4-12 mon  | Infancy         | 4 mon 3♂, 10 mon 1♂, 12 mon 1♀                                        |
| 5                   | 2-4 yrs   | Early childhood | 2 yrs 1♀, 3 yrs 1♂ & 1♀, 4 yrs 1♂                                     |
| 6                   | 8-11 yrs  | Late childhood  | 8 yrs 2♂, 11 yrs 1♀                                                   |
| 7                   | 13-15 yrs | Adolescence     | 13 yrs 1♀, 15 yrs 1♂                                                  |
| 8                   | 18-19 yrs | Early adulthood | 18 yrs 1♂, 19 yrs 1♀                                                  |
| 9                   | 21-30 yrs | Young adulthood | 21 yrs 1♀, 23 yrs 1♂, 30 yrs 1♂                                       |
| 10                  | 36-40 yrs | Middle          | 36 yrs 1♂, 37 yrs 1♂, 40 yrs 1♀                                       |

**Supplementary Table 7. Roadmap Epigenomics samples.**

| Sample number | Sample name                  | Sample annotation |
|---------------|------------------------------|-------------------|
| 1             | Fetal Brain                  | Fetal Brain       |
| 2             | Fetal Brain                  |                   |
| 3             | Neurospheres Cortex Derived  | Adult Brain       |
| 4             | Brain Hippocampus Middle     |                   |
| 5             | Brain Substantia Nigra       |                   |
| 6             | Brain Anterior Caudate       |                   |
| 7             | Brain Cingulate Gyrus        |                   |
| 8             | Brain Inferior Temporal Lobe |                   |
| 9             | Brain Angular Gyrus          |                   |
| 10            | Brain Germinal Matrix        |                   |
| 11            | Brain Mid Frontal Lobe       |                   |
| 12            | NH-A Astrocyte Primary Cells |                   |
| 13            | Fetal_Muscle_Trunk           | Fetal Muscle      |
| 14            | Fetal_Muscle_Leg             |                   |
| 15            | Fetal Heart                  | Fetal Heart       |
| 16            | Skeletal Muscle              | Adult Muscle      |
| 17            | Skeletal Muscle              |                   |
| 18            | Left_Ventricle               | Adult Heart       |
| 19            | Right_Ventricle              |                   |
| 20            | Right_Atrium                 |                   |
| 21            | Aorta                        |                   |
| 22            | Adult Liver                  | Adult Liver       |
| 23            | Fetal Kidney                 | Fetal Kidney      |

**Supplementary Table 8. qPCR primer sequences**

| <b>Target</b> | <b>Species</b> | <b>Forward primer (5'..3')</b> | <b>Reverse primer (5'..3')</b> |
|---------------|----------------|--------------------------------|--------------------------------|
| <i>RPL22</i>  | Human          | tcgctcacctcccttctaa            | tcacggtgatcttgctcttg           |
| <i>Dp427p</i> | Human          | cagcaaaaagctttcctatgaagg       | aaattgtgcattaccattttgtg        |
| <i>Dp427c</i> | Human          | aggagaaagatgctgttttgca         | aaattgtgcattaccattttgtg        |
| <i>Dp140</i>  | Human          | tgctggctgctctgaactaa           | gttctgacaacagtttgccg           |
| <i>Dp71</i>   | Human          | ctgggaagctcactcctcca           | tccagcaagttggttgagtc           |
| <i>Rpl22</i>  | Mouse          | aggagtcgtgacctcgaac            | ttggagaaaggcacctctg            |
| <i>Dp427p</i> | Mouse          | tcacagcaactggagtggaa           | aattgtgcattatccattttgtga       |
